# Supplementary material
Source: MDPI journal article supplement (https://www.mdpi.com/2076-3263/3/3/502)
Supplement: s1 [file s1]

## Sheet: Supplementary
Appendix Detrital zircon U-Pb LA-ICP-MS data for Taimyr samples
	Isotopic Ratios							Apparent Ages
Spot	207Pb/235U	± 2s	206Pb/238U	±2s	207Pb/206Pb	±2s		206Pb/238U	± 2s	207Pb/235U	± 2s	207Pb/206Pb	± 2s	% Disc.
									(Ma)		(Ma)		(Ma)
Sample VP10-12 (Locality: N 75 08.947, E 110 46.729)
1	0.51	0.073	0.0659	0.0042	0.0575	0.0054		411	25	414	50	440	150	0.724638
2	3.49	0.12	0.266	0.012	0.0943	0.0041		1520	60	1524	27	1539	47	4
3	5.17	0.28	0.301	0.015	0.1274	0.0081		1709	70	1855	42	2041	47	11
4	0.539	0.064	0.0688	0.0042	0.0577	0.0076		429	25	433	43	620	170	0.923788
5	0.587	0.059	0.0745	0.0033	0.0584	0.0063		463	20	464	39	585	65	0.215517
6	0.654	0.074	0.0809	0.0033	0.0619	0.0081		502	19	507	45	670	200	0.986193
7	0.29	0.049	0.0399	0.0016	0.0525	0.0084		252.5	9.6	255	39	620	170	0.980392
8	0.289	0.028	0.03557	0.0018	0.059	0.0056		225.3	11	259	21	610	110	13.0116
9	0.668	0.071	0.0819	0.0033	0.0584	0.0064		507	19	508	43	630	120	0.19685
10	0.39	0.021	0.0527	0.0018	0.055	0.003		331	11	333	16	480	60	0.600601
11	0.884	0.049	0.1007	0.006	0.0655	0.0039		618	35	642	26	800	68	3.73832
12	0.278	0.035	0.04	0.0025	0.0538	0.0062		253	15	253	26	520	100	0
13	0.283	0.036	0.0395	0.002	0.0533	0.0067		250	12	251	28	597	79	0.398406
14	0.313	0.021	0.0437	0.0017	0.0513	0.0036		276	11	276	16	414	97	0
15	0.326	0.036	0.0452	0.0017	0.0516	0.0057		285	10	287	29	590	130	0.696864
16	0.311	0.025	0.0428	0.002	0.0515	0.0041		270	13	274	19	440	110	1.45985
17	0.721	0.053	0.0881	0.0037	0.0606	0.0049		544	22	548	31	683	82	0.729927
18	1.12	0.14	0.1147	0.0065	0.0756	0.0079		705	39	760	65	1090	130	7.23684
19	0.593	0.059	0.0745	0.0044	0.0583	0.0058		463	26	471	38	530	150	1.69851
20	1.601	0.097	0.1476	0.0056	0.0765	0.0045		887	32	967	38	1202	84	8.27301
21	0.388	0.08	0.0518	0.0083	0.0561	0.0088		325	50	329	57	420	120	1.21581
22	0.335	0.038	0.0405	0.0022	0.0633	0.0076		255.9	14	291	29	810	190	12.0619
23	0.681	0.048	0.0719	0.0032	0.0699	0.0052		447	19	525	29	920	100	14.8571
24	0.473	0.094	0.0511	0.0035	0.067	0.012		321	22	388	66	750	210	17.268
25	0.311	0.014	0.0405	0.0014	0.0579	0.0039		255.9	8.7	275	11	561	75	6.94545
26	0.489	0.042	0.0643	0.0031	0.0569	0.0048		402	19	403	29	474	49	0.248139
27	0.385	0.036	0.0519	0.002	0.0539	0.0051		326	12	328	27	397	84	0.609756
28	0.591	0.022	0.0753	0.0032	0.0592	0.0033		468	19	471	14	537	61	0.636943
29	0.398	0.064	0.0537	0.0043	0.0526	0.0086		337	26	338	46	540	180	0.295858
30	5.75	0.27	0.349	0.015	0.117	0.005		1927	70	1936	40	1941	57	5
31	0.644	0.052	0.08	0.0032	0.0594	0.0049		496	19	501	32	573	87	0.998004
32	0.347	0.043	0.0388	0.0018	0.0662	0.0065		246	11	300	32	800	120	18
33	0.312	0.052	0.0436	0.0024	0.0508	0.008		275	15	278	38	610	100	1.07914
34	0.432	0.056	0.057	0.0027	0.0573	0.0073		357	17	361	39	520	110	1.10803
35	0.68	0.11	0.0632	0.005	0.077	0.013		395	30	522	68	1050	160	24.3295
36	0.637	0.068	0.0792	0.0036	0.0581	0.0055		491	21	498	42	650	170	1.40562
37	0.604	0.044	0.0768	0.0037	0.0577	0.0044		477	22	478	28	490	110	0.209205
38	0.714	0.038	0.088	0.0031	0.0596	0.003		544	18	545	22	614	57	0.183486
39	0.345	0.027	0.0458	0.0021	0.0562	0.0045		289	13	300	20	524	74	3.66667
40	0.302	0.024	0.042	0.0016	0.0551	0.0048		265	10	269	20	528	79	1.48699
41	4.21	0.26	0.266	0.013	0.1149	0.0047		1519	68	1670	50	1883	26	10
42	0.714	0.081	0.0823	0.0038	0.0629	0.0072		510	22	543	49	738	67	6.07735
43	2.86	0.13	0.24	0.012	0.0886	0.0042		1385	63	1385	42	1418	48	4
44	6.82	0.35	0.378	0.017	0.1321	0.0054		2065	81	2085	45	2103	44	6
45	19.3	1.2	0.605	0.03	0.233	0.013		3050	120	3051	59	3076	54	7
46	5.52	0.46	0.343	0.015	0.1152	0.0093		1901	70	1901	70	1882	62	9
47	0.34	0.034	0.0406	0.0018	0.0595	0.0057		256	11	296	26	680	140	13.5135
48	1.022	0.061	0.1171	0.0053	0.0652	0.005		714	31	714	30	791	58	0
49	0.292	0.043	0.0425	0.0022	0.0548	0.0074		268	14	271	34	500	110	1.10701
50	8.02	0.48	0.412	0.017	0.1417	0.0065		2225	78	2227	55	2247	33	5
51	0.644	0.032	0.0809	0.0038	0.0577	0.0028		501	23	503	19	493	65	0.397614
52	1.09	0.14	0.1159	0.0056	0.0701	0.0084		707	33	769	78	1020	150	8.06242
53	0.44	0.042	0.055	0.0025	0.0577	0.0054		345	15	370	29	570	130	6.75676
54	0.91	0.076	0.1071	0.0059	0.0613	0.005		656	34	656	39	636	56	0
55	1.799	0.091	0.1557	0.0057	0.0846	0.0039		932	32	1048	32	1347	47	11.0687
56	4.59	0.24	0.311	0.021	0.1094	0.0043		1740	99	1740	41	1784	49	7
57	0.343	0.024	0.0474	0.0018	0.0529	0.0038		299	11	301	17	367	90	0.664452
58	0.559	0.05	0.0726	0.0032	0.0571	0.0065		451	19	457	31	563	84	1.31291
59	0.829	0.061	0.0986	0.0032	0.0616	0.0044		606	19	611	33	760	110	0.818331
60	0.387	0.042	0.0518	0.0021	0.0545	0.0067		325	13	331	30	420	170	1.81269
61	0.81	0.11	0.0442	0.0019	0.13	0.018		279	12	597	60	2150	120	53.2663
62	1.492	0.07	0.1546	0.0056	0.0706	0.0034		926	31	929	28	968	49	0.322928
63	0.466	0.097	0.0597	0.0031	0.054	0.011		374	19	376	67	640	180	0.531915
64	1.68	0.2	0.163	0.0092	0.0716	0.007		973	51	1017	64	1080	110	7
65	0.374	0.038	0.0513	0.0023	0.0545	0.0057		322	14	323	29	490	100	0.309598
66	0.416	0.068	0.0553	0.0036	0.0559	0.0084		347	22	350	48	460	120	0.857143
67	0.419	0.05	0.0559	0.0026	0.0544	0.0072		351	16	353	36	481	97	0.566572
68	11.42	0.38	0.461	0.016	0.1772	0.0051		2444	71	2556	31	2634	25	7
69	0.293	0.018	0.0408	0.0016	0.0524	0.0034		258	9.9	259	14	383	79	0.3861
70	0.41	0.16	0.0512	0.0039	0.066	0.028		322	24	330	110	1210	440	2.42424
71	0.736	0.068	0.0894	0.0072	0.0649	0.0067		551	42	554	40	860	140	0.541516
72	0.753	0.06	0.0915	0.0042	0.0591	0.0056		564	25	567	36	640	150	0.529101
73	5.06	0.54	0.326	0.02	0.1201	0.005		1818	98	1814	96	1919	45	7
74	0.356	0.041	0.0478	0.002	0.0521	0.0059		301	13	303	30	660	130	0.660066
75	1.24	0.13	0.1277	0.0072	0.0684	0.0063		774	41	822	56	920	140	5.83942
76	1.249	0.084	0.1334	0.0053	0.0673	0.0042		807	30	820	38	870	59	1.58537
77	8.91	0.73	0.226	0.01	0.286	0.026		1314	55	2314	75	3360	130	77
78	0.966	0.045	0.1109	0.0039	0.0637	0.0028		681	21	684	23	765	46	0.438596
79	0.465	0.072	0.0626	0.003	0.0545	0.009		391	18	393	47	510	160	0.508906
80	0.382	0.027	0.0515	0.0037	0.0554	0.0045		323	23	328	20	421	99	1.52439
81	0.6	0.052	0.0763	0.0032	0.0573	0.0039		474	19	474	32	442	81	0
82	0.418	0.065	0.0555	0.003	0.0494	0.0085		348	18	349	46	700	140	0.286533
83	10.86	0.4	0.454	0.018	0.1743	0.0052		2414	81	2509	35	2577	37	6
84	0.695	0.071	0.0865	0.0031	0.0563	0.0043		535	19	534	42	590	160	-0.187266
85	1.189	0.072	0.1302	0.0051	0.0663	0.0038		789	29	791	34	832	80	0.252845
86	0.738	0.04	0.0899	0.0032	0.0591	0.0035		555	19	558	24	610	62	0.537634
87	5.9	0.19	0.356	0.012	0.1191	0.0031		1964	59	1969	30	1949	34	4
88	1.043	0.098	0.1185	0.0051	0.0636	0.0047		722	29	721	50	750	96	-0.138696
89	0.615	0.022	0.0676	0.0034	0.0653	0.0034		421	20	487	14	752	74	13.5524
90	0.313	0.088	0.0438	0.0039	0.06	0.017		276	24	287	76	850	150	3.83275
91	0.707	0.095	0.0849	0.0037	0.0599	0.0076		525	22	536	56	720	140	2.05224
92	2.86	0.13	0.2354	0.0091	0.0902	0.0039		1362	48	1368	36	1410	31	5
93	2.03	0.13	0.1929	0.0079	0.0756	0.0041		1137	43	1141	44	1162	68	5
94	0.78	0.12	0.0881	0.0075	0.0639	0.0089		556	40	577	70	830	160	3.63951
95	0.358	0.036	0.0495	0.002	0.0528	0.0057		311	12	309	28	680	110	0.647249
96	0.683	0.052	0.0853	0.0032	0.0614	0.0042		527	19	532	30	668	88	0.93985
97	0.651	0.062	0.0817	0.0045	0.0577	0.0076		506	27	506	38	670	130	0
98	0.67	0.11	0.0833	0.0057	0.0588	0.0092		515	34	516	71	860	190	0.193798
99	0.816	0.052	0.0982	0.0035	0.0606	0.0037		604	21	604	28	654	71	0
100	0.671	0.047	0.0836	0.0043	0.0588	0.0036		517	26	521	28	600	88	0.767754
101	0.451	0.031	0.055	0.0025	0.0619	0.0041		345	15	386	26	642	64	10.6218
102	0.449	0.043	0.0614	0.0025	0.0548	0.0057		384	15	384	30	543	96	0
103	6.02	0.3	0.358	0.023	0.1202	0.0065		1970	110	1977	43	1955	44	6
104	0.368	0.04	0.0487	0.0027	0.0552	0.005		307	16	318	29	376	62	3.45912
105	0.476	0.04	0.0622	0.0027	0.0556	0.0049		389	16	392	27	555	95	0.765306
106	0.368	0.04	0.05	0.0027	0.0529	0.0058		314	16	317	29	580	150	0.946372
107	0.288	0.05	0.0392	0.0032	0.054	0.011		248	20	256	40	620	290	3.125
108	0.753	0.077	0.0904	0.0039	0.0582	0.0054		558	23	566	43	510	130	1.41343
109	0.667	0.076	0.083	0.0046	0.0557	0.0085		514	27	516	46	590	130	0.387597
110	0.655	0.058	0.055	0.0024	0.0869	0.0064		345	15	510	36	1300	120	32.3529
111	1.517	0.086	0.1553	0.0073	0.0693	0.0036		930	41	934	35	909	75	0.428266
112	2.09	0.14	0.154	0.01	0.1016	0.0059		923	56	1140	46	1654	42	19.0351
113	0.334	0.024	0.0467	0.0018	0.0543	0.0042		294	11	298	20	450	70	1.34228
114	0.584	0.027	0.0745	0.0026	0.0574	0.0025		463	15	465	17	470	62	0.430108
115	5.29	0.23	0.335	0.014	0.1154	0.0046		1863	66	1865	37	1874	29	4
116	1.21	0.4	0.1408	0.007	0.059	0.021		849	40	850	150	730	200	0.117647
117	2.362	0.079	0.21	0.0071	0.0807	0.0029		1229	38	1228	24	1248	33	5
118	0.457	0.031	0.0528	0.0027	0.061	0.0048		332	16	380	22	650	100	12.6316
119	4.11	0.14	0.292	0.01	0.1007	0.0035		1652	50	1655	27	1628	40	3
120	0.301	0.034	0.0417	0.0018	0.0494	0.0046		264	11	266	26	268	99	0.75188
121	0.32	0.022	0.0442	0.0016	0.0521	0.0037		279	10	281	17	378	75	0.711744
122	0.651	0.036	0.0815	0.0039	0.0574	0.0041		505	23	508	22	590	110	0.590551
123	0.793	0.041	0.0961	0.0033	0.0608	0.0029		591	20	592	23	627	51	0.168919
124	0.639	0.068	0.0731	0.003	0.063	0.0063		455	18	497	42	730	150	8.4507
125	0.357	0.054	0.0477	0.0024	0.0543	0.0071		300	15	305	39	670	200	1.63934
126	0.333	0.015	0.0461	0.0016	0.0517	0.0023		290.4	9.6	291	12	355	50	0.206186
127	1.602	0.047	0.1327	0.0051	0.085	0.003		803	29	969	18	1324	55	17.1311
128	0.565	0.06	0.0558	0.0023	0.0726	0.0077		350	14	451	39	1020	120	22.3947
129	0.461	0.037	0.0611	0.0023	0.0551	0.0043		382	14	382	26	458	70	0
130	0.59	0.024	0.076	0.0027	0.0562	0.0023		472	16	472	16	432	50	0
131	1.378	0.07	0.1448	0.0061	0.068	0.0036		871	34	878	30	888	56	0.797267
132	0.313	0.031	0.0445	0.0022	0.053	0.0051		281	14	282	26	320	120	0.35461
133	0.5	0.1	0.0627	0.0034	0.057	0.01		392	21	399	70	620	150	1.75439
134	0.89	0.059	0.1072	0.0042	0.0621	0.0062		657	24	657	37	660	120	0
135	1.46	0.15	0.154	0.011	0.071	0.0078		925	60	926	67	980	150	0.107991
136	1.39	0.11	0.147	0.0056	0.0679	0.0047		884	31	885	48	880	87	0.112994
137	2.11	0.16	0.1954	0.0075	0.0781	0.0059		1150	41	1153	55	1166	72	8
138	0.632	0.035	0.0795	0.0034	0.0567	0.0026		493	20	495	22	436	80	0.40404
139	0.301	0.033	0.0416	0.0018	0.0525	0.0057		263	11	265	26	467	99	0.754717
140	0.692	0.056	0.0853	0.0036	0.0594	0.0042		528	22	527	33	634	76	-0.189753
141	2.39	0.2	0.211	0.012	0.0815	0.0064		1233	65	1232	61	1290	110	7
142	0.585	0.034	0.0757	0.0028	0.0563	0.0038		470	17	471	23	468	91	0.212314
143	13.14	0.37	0.497	0.018	0.1938	0.0048		2600	80	2692	26	2777	28	7
144	0.308	0.027	0.0419	0.0022	0.0525	0.0044		265	13	272	21	390	130	2.57353
145	0.635	0.038	0.0805	0.0028	0.0581	0.0035		499	17	497	23	530	69	-0.402414
Sample VP10-14 (Locality: N 75 09.369, E 110 46.522)
1	12.02	0.26	0.489	0.014	0.1778	0.0048		2564	58	2604	20	2619	23	5
2	1.234	0.068	0.1301	0.0061	0.0719	0.0035		788	35	819	32	993	42	3.7851
3	0.365	0.024	0.0495	0.0014	0.0538	0.0037		311.5	8.5	314	18	458	84	0.796178
4	0.505	0.059	0.066	0.0027	0.0594	0.0058		412	16	413	40	570	140	0.242131
5	0.354	0.019	0.0477	0.0016	0.0543	0.0027		300	10	306	14	470	58	1.96078
6	0.389	0.04	0.053	0.0017	0.054	0.0052		333	10	338	31	440	130	1.47929
7	5.43	0.22	0.342	0.0099	0.1128	0.0049		1896	47	1893	35	1856	43	6
8	5.13	0.16	0.33	0.01	0.1124	0.0031		1835	50	1835	27	1841	25	5
9	0.659	0.096	0.0815	0.005	0.0582	0.0072		505	30	507	60	540	100	0.394477
10	5.68	0.19	0.2706	0.0098	0.1545	0.0067		1543	50	1927	30	2370	41	28
11	0.6	0.035	0.0792	0.002	0.0579	0.0039		492	12	487	23	515	91	1.02669
12	9.6	0.36	0.409	0.012	0.1628	0.0054		2210	56	2396	34	2491	23	10
13	5.53	0.18	0.344	0.015	0.1154	0.0053		1903	73	1904	27	1887	47	5
14	0.332	0.024	0.0459	0.0017	0.0508	0.0034		289	10	291	18	279	59	0.687285
15	3	0.15	0.243	0.01	0.0884	0.0064		1400	52	1405	40	1434	48	7
16	1.28	0.086	0.1371	0.0036	0.068	0.0047		828	21	832	38	870	80	0.480769
17	0.614	0.052	0.0786	0.003	0.0571	0.0042		487	18	490	33	572	94	0.612245
18	0.364	0.059	0.0494	0.002	0.0523	0.0083		311	12	311	46	860	190	0
19	1.95	0.13	0.1664	0.007	0.087	0.005		992	38	1103	48	1359	76	10.0635
20	0.627	0.041	0.0779	0.0023	0.0597	0.0047		484	14	490	26	610	97	1.22449
21	4.56	0.28	0.306	0.01	0.1096	0.007		1735	58	1737	49	1730	120	7
22	0.65	0.024	0.0813	0.0018	0.0572	0.0024		504	11	507	15	519	54	0.591716
23	2.03	0.6	0.212	0.016	0.067	0.02		1236	85	1090	190	1020	210	27
24	0.44	0.095	0.0577	0.003	0.056	0.012		361	18	364	67	410	150	0.824176
25	0.596	0.059	0.076	0.0029	0.0573	0.0059		472	17	475	36	640	140	0.631579
26	0.62	0.068	0.0775	0.0034	0.0624	0.0081		481	20	485	41	680	140	0.824742
27	0.657	0.068	0.0827	0.0037	0.056	0.0066		512	22	515	45	520	120	0.582524
28	4.26	0.22	0.2635	0.007	0.1167	0.0053		1508	35	1682	43	1863	44	12
29	0.651	0.031	0.082	0.002	0.0569	0.0029		508	12	510	18	505	70	0.392157
30	15.99	0.36	0.566	0.016	0.203	0.0053		2889	65	2882	21	2852	27	6
31	12.56	0.35	0.506	0.015	0.1797	0.0052		2648	59	2651	24	2658	30	4
32	20.13	0.66	0.619	0.027	0.2419	0.0076		3100	110	3105	35	3124	21	7
33	2.48	0.55	0.232	0.022	0.083	0.022		1340	110	1340	150	1340	210	24
34	0.43	0.1	0.0575	0.0035	0.057	0.014		361	22	361	72	520	150	0
35	0.359	0.039	0.0489	0.0014	0.0534	0.0059		307.9	8.6	308	30	565	99	0.0324675
36	5.23	0.14	0.3336	0.0079	0.1147	0.003		1855	38	1856	24	1890	27	3
37	1.314	0.09	0.1418	0.0049	0.0684	0.0053		855	28	854	41	916	89	0.117096
38	0.697	0.063	0.0853	0.0028	0.0596	0.0055		527	17	529	38	672	89	0.378072
39	0.348	0.017	0.0478	0.0012	0.0523	0.0031		302	7.3	305	14	306	62	0.983607
40	0.656	0.062	0.0817	0.0024	0.0581	0.0047		506	14	509	39	511	75	0.589391
41	0.414	0.037	0.055	0.002	0.0569	0.0039		345	12	349	27	519	70	1.14613
42	8.23	0.28	0.3856	0.0094	0.1518	0.0043		2101	44	2256	32	2361	31	9
43	9.41	0.44	0.442	0.018	0.1559	0.0064		2368	83	2369	44	2435	37	7
44	0.688	0.055	0.0851	0.0029	0.0584	0.0041		526	18	529	32	530	100	0.567108
45	0.403	0.021	0.0549	0.0017	0.0529	0.003		344	10	343	15	388	66	0.291545
46	0.311	0.033	0.043	0.0017	0.0548	0.0061		271	10	272	25	520	100	0.367647
47	0.35	0.026	0.0475	0.0016	0.0544	0.0041		299	10	303	19	462	79	1.32013
48	5.36	0.21	0.3375	0.0085	0.1124	0.0048		1874	41	1875	34	1819	41	5
49	0.531	0.058	0.0724	0.0022	0.0549	0.005		451	13	456	35	526	88	1.09649
50	0.358	0.036	0.0488	0.0025	0.0535	0.0053		307	15	309	27	386	62	0.647249
51	5.03	0.12	0.3268	0.0086	0.1102	0.0033		1822	42	1825	19	1810	30	5
52	0.658	0.082	0.0829	0.0053	0.065	0.012		513	32	518	46	690	120	0.965251
53	0.357	0.02	0.0485	0.0013	0.054	0.0036		305.2	7.8	311	15	448	74	1.86495
54	1.159	0.079	0.1293	0.0036	0.0637	0.0038		784	21	788	33	703	85	0.507614
55	14.06	0.51	0.501	0.016	0.2013	0.0059		2631	61	2749	35	2832	27	8
56	0.686	0.048	0.0847	0.005	0.058	0.0044		524	29	528	29	565	60	0.757576
57	4.95	0.17	0.3261	0.0083	0.1121	0.0043		1819	40	1823	30	1851	34	5
58	0.634	0.045	0.0792	0.0024	0.0594	0.005		491	14	493	28	530	97	0.40568
59	4.8	2.1	0.377	0.032	0.079	0.039		2060	150	1700	360	1470	440	38
60	4.92	0.17	0.3155	0.0079	0.1098	0.004		1767	39	1805	29	1797	44	3
61	0.42	0.04	0.057	0.0015	0.0512	0.0051		357.5	9.4	352	29	455	99	1.5625
62	0.679	0.055	0.0835	0.0042	0.0597	0.0038		517	25	521	33	566	95	0.767754
63	17.73	0.83	0.586	0.031	0.222	0.013		2970	130	2972	45	3008	54	10
64	0.65	0.15	0.0821	0.0067	0.062	0.014		508	40	510	100	840	140	0.392157
65	4.91	0.14	0.3226	0.0082	0.1103	0.004		1801	40	1803	24	1815	40	6
66	1.2	0.13	0.1301	0.0052	0.0673	0.0061		788	30	790	56	880	110	0.253165
67	5.47	0.22	0.3419	0.0093	0.1145	0.0044		1895	45	1893	34	1858	35	4
68	0.421	0.082	0.0548	0.0033	0.057	0.012		344	20	343	60	950	150	0.291545
69	0.363	0.044	0.0506	0.0019	0.0476	0.0065		318	12	318	35	420	100	0
70	0.76	0.11	0.0971	0.0043	0.0558	0.008		597	25	594	65	890	160	0.505051
71	0.636	0.06	0.0823	0.0037	0.0572	0.0029		510	22	513	45	510	140	0.584795
72	5.24	0.32	0.248	0.012	0.1522	0.0065		1425	59	1852	49	2407	44	30
73	1.124	0.085	0.1263	0.0086	0.0641	0.0052		766	49	763	41	770	130	0.393185
74	0.458	0.064	0.0589	0.0027	0.0567	0.0083		369	16	371	45	730	130	0.539084
75	0.326	0.045	0.0443	0.0018	0.0548	0.008		280	11	280	34	680	150	0
76	0.33	0.062	0.0446	0.0018	0.0519	0.0093		282	11	281	46	650	190	0.355872
77	1.16	0.18	0.1334	0.0067	0.0637	0.0098		806	38	806	80	890	150	0
78	0.663	0.043	0.083	0.002	0.0574	0.0039		514	12	516	26	554	55	0.387597
79	0.558	0.055	0.0711	0.0021	0.0565	0.0056		443	13	444	36	650	130	0.225225
80	0.313	0.064	0.0443	0.0025	0.051	0.011		279	16	280	53	750	200	0.357143
81	0.544	0.078	0.0768	0.0041	0.0509	0.0081		476	25	472	45	540	160	0.847458
82	12.35	0.34	0.504	0.014	0.177	0.0054		2629	61	2628	26	2634	36	6
83	0.7	0.11	0.0849	0.0033	0.0608	0.0092		525	19	531	65	700	180	1.12994
84	1.248	0.099	0.1348	0.0045	0.0698	0.0067		815	25	817	43	960	100	0.244798
85	0.362	0.078	0.0466	0.003	0.059	0.012		293	19	302	58	730	210	2.98013
86	0.594	0.095	0.0711	0.0032	0.06	0.0095		445	19	447	61	800	130	0.447427
87	17.16	0.78	0.577	0.019	0.2176	0.0097		2934	79	2934	45	2959	51	9
88	0.629	0.036	0.079	0.0023	0.0578	0.0035		490	14	492	22	512	73	0.406504
89	4.38	0.29	0.304	0.014	0.1077	0.0048		1710	67	1714	51	1756	68	5
90	0.348	0.025	0.0482	0.0014	0.0514	0.0039		303.7	8.6	304	18	416	79	0.0986842
91	1.24	0.14	0.1298	0.0051	0.0679	0.0076		786	29	788	67	1000	140	0.253807
92	0.61	0.11	0.0763	0.0038	0.0526	0.0097		473	23	474	71	760	180	0.21097
93	0.382	0.035	0.0522	0.0016	0.0523	0.0048		328	10	329	25	479	89	0.303951
94	0.69	0.1	0.0926	0.0042	0.0555	0.0089		571	25	571	60	680	120	0
95	4.83	0.37	0.318	0.012	0.1078	0.0077		1789	57	1789	63	1792	71	8
96	1.5	0.13	0.1577	0.0052	0.0701	0.0059		943	29	946	54	898	91	0.317125
97	0.517	0.051	0.0666	0.0021	0.0549	0.0059		416	13	418	34	520	100	0.478469
98	0.327	0.033	0.045	0.0014	0.0545	0.0058		283.5	8.8	283	25	530	100	0.176678
99	0.64	0.1	0.0777	0.0041	0.0605	0.0093		482	25	486	61	890	170	0.823045
100	5.33	0.3	0.329	0.011	0.1191	0.0051		1835	51	1876	45	1937	42	5
101	0.624	0.037	0.0784	0.0017	0.0583	0.0036		486	10	488	23	575	60	0.409836
102	0.335	0.055	0.0451	0.0018	0.06	0.011		284	11	284	44	810	130	0
103	16	2.1	0.557	0.015	0.221	0.028		2855	60	2860	130	2991	69	8
104	9.23	0.31	0.4303	0.009	0.1617	0.0048		2312	39	2358	31	2457	22	3
105	12.23	0.4	0.475	0.015	0.1814	0.0053		2504	68	2619	31	2663	26	8
106	0.477	0.079	0.0614	0.0028	0.062	0.011		384	17	375	56	810	130	2.4
107	0.395	0.093	0.0505	0.0026	0.061	0.015		317	16	319	66	1220	290	0.626959
108	0.486	0.063	0.0663	0.0024	0.056	0.0072		414	14	414	44	710	130	0
109	13.45	0.94	0.51	0.018	0.191	0.013		2651	75	2716	60	2778	52	12
110	4.04	0.21	0.2884	0.0077	0.1035	0.0058		1639	41	1641	46	1683	60	8
111	0.68	0.13	0.0791	0.0035	0.058	0.011		493	20	493	82	940	160	0
112	1.2	0.15	0.1321	0.0043	0.0641	0.0078		799	25	801	66	830	100	0.249688
113	0.549	0.062	0.0705	0.0033	0.0571	0.0068		439	20	441	41	500	140	0.453515
114	0.363	0.048	0.0498	0.0018	0.0568	0.0081		313	11	309	37	840	140	1.2945
115	0.593	0.056	0.0765	0.0033	0.0558	0.0054		475	20	474	37	560	120	0.21097
116	0.462	0.033	0.0623	0.0021	0.0549	0.0047		390	12	389	25	529	96	0.257069
117	0.665	0.091	0.082	0.0032	0.061	0.0084		508	19	510	58	730	120	0.392157
118	1.37	0.12	0.1467	0.0049	0.0685	0.0066		882	28	883	52	894	96	0.11325
119	0.389	0.028	0.0526	0.0016	0.0518	0.0036		330.2	9.9	333	21	358	96	0.840841
120	1.172	0.074	0.1298	0.0045	0.0671	0.0041		786	26	788	33	837	80	0.253807
121	0.432	0.041	0.0572	0.0017	0.0529	0.0046		358	10	360	29	593	82	0.555556
122	0.6	0.13	0.0741	0.0039	0.062	0.015		460	23	459	91	910	190	0.217865
123	0.378	0.049	0.0517	0.0021	0.0493	0.0064		325	13	328	34	460	120	0.914634
124	3.79	0.27	0.277	0.009	0.1029	0.0073		1575	46	1579	57	1747	63	9
125	1.36	0.32	0.1379	0.0092	0.069	0.017		832	52	830	150	960	230	0.240964
126	0.64	0.11	0.0826	0.0041	0.062	0.01		511	24	513	68	800	160	0.389864
127	5.12	0.32	0.3282	0.0091	0.1119	0.0065		1829	44	1835	53	1881	64	4
128	0.632	0.092	0.0779	0.0033	0.0563	0.009		483	19	483	59	690	130	0
129	0.648	0.037	0.0809	0.0019	0.0571	0.0035		501	11	504	23	493	64	0.595238
130	1.17	0.077	0.1287	0.0047	0.0671	0.0045		780	27	781	37	776	92	0.128041
131	4.37	0.39	0.268	0.016	0.119	0.012		1539	86	1687	79	1930	100	18
132	10.21	0.35	0.461	0.011	0.1607	0.0054		2448	49	2448	32	2453	34	5
133	5	0.15	0.3258	0.0075	0.1112	0.004		1817	37	1817	25	1812	43	6
134	0.83	0.17	0.0982	0.0069	0.054	0.011		603	40	604	99	840	240	0.165563
135	0.683	0.088	0.0856	0.0033	0.0594	0.0076		529	20	530	55	750	110	0.188679
136	0.359	0.041	0.0513	0.0018	0.0536	0.0059		322	11	322	32	559	81	0
137	4.92	0.16	0.3217	0.0079	0.111	0.004		1797	39	1800	27	1841	30	6
138	5.26	0.29	0.334	0.01	0.1149	0.0066		1856	48	1859	46	1870	56	8
139	5.46	0.41	0.34	0.016	0.1119	0.0093		1883	77	1886	66	1840	120	9
140	0.97	0.12	0.1153	0.0053	0.0613	0.008		702	31	708	63	910	130	0.847458
141	0.513	0.07	0.0712	0.0029	0.0514	0.0077		443	17	422	51	810	170	4.9763
142	0.466	0.088	0.0609	0.0045	0.0527	0.0087		381	27	382	63	650	240	0.26178
143	5.05	0.46	0.325	0.012	0.1109	0.0094		1812	57	1816	77	1810	62	8
144	5.1	0.35	0.3298	0.0096	0.1107	0.0073		1836	46	1838	62	1841	61	9
145	12.44	0.32	0.506	0.011	0.1767	0.0058		2641	47	2643	24	2613	30	6
146	0.692	0.074	0.085	0.0025	0.0606	0.0066		526	15	528	43	731	91	0.378788
147	13.97	0.89	0.529	0.016	0.194	0.014		2735	66	2739	61	2779	58	8
148	5.37	0.25	0.339	0.011	0.1128	0.0048		1881	54	1880	41	1876	52	6
149	4.83	0.27	0.318	0.011	0.109	0.0062		1779	55	1784	48	1808	49	7
150	0.49	0.1	0.063	0.0034	0.057	0.012		394	21	394	72	880	140	0
151	0.429	0.054	0.0576	0.0019	0.0547	0.0065		361	11	363	38	660	130	0.550964
152	10.9	1.1	0.451	0.03	0.176	0.015		2390	130	2492	91	2595	74	9
153	1.14	0.19	0.129	0.0059	0.066	0.011		781	34	782	94	1080	220	0.127877
154	0.458	0.081	0.0574	0.003	0.059	0.01		359	18	366	59	790	150	1.91257
155	0.361	0.066	0.0472	0.0029	0.0542	0.0096		297	18	300	50	720	120	1
156	0.616	0.077	0.0802	0.0036	0.0547	0.0071		497	22	500	45	680	140	0.6
157	0.88	0.087	0.1036	0.0028	0.0624	0.0061		635	17	636	48	776	86	0.157233
158	0.407	0.072	0.0518	0.0023	0.058	0.01		326	14	326	52	940	160	0
159	0.45	0.15	0.0547	0.0038	0.057	0.017		343	23	350	100	830	240	2
160	5.14	0.31	0.329	0.01	0.1141	0.0072		1832	51	1833	52	1847	67	12
161	0.631	0.078	0.0788	0.0032	0.0578	0.0064		488	19	489	47	710	120	0.204499
162	0.653	0.07	0.0826	0.0028	0.0573	0.0063		511	17	512	44	729	84	0.195312
163	4.2	0.44	0.295	0.023	0.1044	0.0091		1660	120	1660	87	1733	81	9
164	0.605	0.07	0.0765	0.003	0.0596	0.0069		475	18	479	45	710	150	0.835073
165	0.447	0.059	0.0578	0.0021	0.0574	0.0074		362	13	363	42	780	150	0.275482
Sample VP10-25 (Locality: N 75 11.540, E 110 37.642)
1	0.476	0.083	0.0666	0.0038	0.049	0.01		415	23	419	58	750	140	0.954654
2	1.12	0.16	0.125	0.01	0.063	0.01		759	57	762	70	820	180	0.393701
3	0.64	0.081	0.0836	0.0037	0.0496	0.0068		518	22	516	51	500	130	0.387597
4	4.18	0.69	0.286	0.017	0.101	0.018		1640	100	1640	140	1610	150	13
5	0.5	0.12	0.0627	0.0076	0.057	0.015		392	46	403	77	820	260	2.72953
6	6.08	0.45	0.354	0.017	0.1225	0.0095		1961	85	1965	68	1976	95	9
7	0.413	0.056	0.0561	0.0028	0.0504	0.0078		352	17	355	40	720	210	0.84507
8	0.407	0.04	0.0549	0.003	0.0542	0.0063		344	18	345	29	500	150	0.289855
9	2.85	0.12	0.1725	0.0071	0.1067	0.0074		1026	39	1375	36	1705	82	28
10	0.69	0.15	0.0797	0.0073	0.057	0.014		494	44	514	90	660	180	3.89105
11	0.844	0.08	0.1008	0.0047	0.0595	0.0066		619	27	621	43	610	100	0.322061
12	0.85	0.091	0.1019	0.0067	0.0628	0.0077		625	39	629	47	710	120	0.63593
13	0.463	0.087	0.0594	0.004	0.057	0.013		372	24	393	55	840	220	5.34351
14	1.01	0.2	0.1096	0.0067	0.057	0.011		670	39	680	100	670	210	1.47059
15	4.02	0.29	0.289	0.012	0.093	0.0094		1634	60	1649	66	1484	86	7
16	0.54	0.12	0.0684	0.0048	0.051	0.012		426	29	430	83	560	200	0.930233
17	0.66	0.11	0.0818	0.0043	0.056	0.01		506	26	508	68	790	120	0.393701
18	0.61	0.062	0.0775	0.0037	0.0557	0.0061		481	22	483	40	600	130	0.414079
19	1.07	0.27	0.118	0.012	0.059	0.017		717	70	720	140	580	330	0.416667
20	4.74	0.42	0.31	0.021	0.104	0.011		1740	100	1768	72	1710	120	8
21	0.431	0.088	0.0553	0.003	0.058	0.013		347	18	357	63	590	220	2.80112
22	0.88	0.11	0.104	0.0062	0.0545	0.0064		637	36	638	57	504	89	0.15674
23	12.11	0.52	0.5	0.021	0.167	0.012		2610	88	2609	39	2511	69	7
24	5.73	0.44	0.326	0.015	0.1178	0.0094		1820	72	1930	69	1840	170	11
25	0.46	0.048	0.0601	0.0032	0.0526	0.0071		376	19	380	34	590	140	1.05263
26	0.91	0.13	0.1045	0.0059	0.0617	0.0078		640	35	639	67	910	140	0
27	0.472	0.043	0.0612	0.0029	0.0549	0.0054		383	17	387	30	520	100	1.03359
28	0.602	0.052	0.0764	0.0038	0.0554	0.0055		474	23	475	31	580	95	0.210526
29	4.94	0.2	0.326	0.014	0.1098	0.0081		1817	67	1821	36	1823	85	9
30	0.825	0.078	0.0978	0.0049	0.0619	0.0068		601	29	602	43	770	120	0.166113
31	5.26	0.28	0.32	0.015	0.1045	0.0076		1788	73	1858	46	1788	78	4
32	0.76	0.14	0.0902	0.0047	0.064	0.014		557	28	557	80	890	230	0
33	0.466	0.086	0.0592	0.0044	0.052	0.0091		371	27	374	59	880	150	0.802139
34	1.35	0.22	0.1409	0.0083	0.063	0.011		849	47	850	100	900	200	0.117647
35	0.394	0.035	0.0526	0.0022	0.0508	0.0051		330	14	334	25	450	130	1.1976
36	0.466	0.068	0.0615	0.0036	0.0504	0.0068		384	22	385	48	590	120	0.25974
37	0.468	0.077	0.0609	0.0079	0.058	0.011		381	48	386	53	640	210	1.29534
38	5.38	0.45	0.333	0.017	0.111	0.01		1863	87	1880	68	1852	81	11
39	0.679	0.062	0.0847	0.0036	0.0541	0.006		529	21	527	37	540	130	0
40	0.63	0.05	0.0813	0.0035	0.0526	0.0052		504	21	490	31	540	120	3
41	0.827	0.09	0.0993	0.0052	0.0564	0.0074		610	30	612	48	590	160	0.326797
42	5.39	0.22	0.339	0.014	0.1092	0.0077		1887	69	1883	35	1802	80	7
43	0.441	0.038	0.0588	0.0028	0.0551	0.0059		370	17	372	28	480	100	0.537634
44	6.23	0.38	0.346	0.017	0.117	0.011		1915	81	2021	46	1910	100	7
45	0.75	0.11	0.0816	0.0045	0.068	0.012		505	27	570	66	990	160	11.4035
46	4.23	0.38	0.284	0.014	0.1	0.015		1612	68	1674	73	1650	100	9
47	0.62	0.16	0.0772	0.0053	0.055	0.013		479	32	480	100	900	230	0.208333
48	0.643	0.075	0.0814	0.0038	0.0583	0.008		504	22	509	50	640	170	0.982318
49	1.1	0.13	0.1202	0.0062	0.0662	0.0091		731	36	731	64	860	110	0
50	0.505	0.093	0.0648	0.0035	0.053	0.01		407	22	410	63	860	240	0.731707
51	0.86	0.14	0.1011	0.0069	0.064	0.012		620	41	627	74	780	170	1.11643
52	0.436	0.067	0.0585	0.0029	0.0481	0.0077		367	17	370	45	460	150	0.810811
53	1.05	0.11	0.1208	0.0062	0.0569	0.0063		735	36	739	53	600	150	0.541272
54	0.814	0.067	0.0964	0.0041	0.0575	0.0057		593	24	597	37	590	140	0.670017
55	8.95	0.55	0.39	0.023	0.143	0.013		2120	110	2328	57	2280	110	14
56	0.408	0.05	0.0549	0.0028	0.0499	0.0067		345	17	349	33	540	120	1.14613
57	1.11	0.18	0.0668	0.0047	0.13	0.025		416	28	767	80	2000	240	45.7627
58	0.648	0.081	0.0798	0.0041	0.0617	0.0098		495	25	499	53	1060	180	0.801603
59	1.55	0.13	0.1358	0.0079	0.0698	0.0064		820	45	983	56	1000	110	16.5819
60	1.57	0.16	0.1471	0.0081	0.0727	0.0088		884	46	961	66	1010	120	8.01249
61	3.33	0.15	0.2431	0.0098	0.1005	0.0076		1403	51	1485	36	1644	87	6
62	0.58	0.12	0.0685	0.0048	0.056	0.011		426	29	428	78	1020	150	0.46729
63	5.31	0.33	0.335	0.014	0.1073	0.0091		1863	70	1862	55	1795	92	10
64	13.03	0.76	0.526	0.023	0.17	0.014		2725	99	2689	61	2593	58	6
65	1.48	0.14	0.1529	0.0077	0.0659	0.0075		916	43	915	56	870	140	0
66	0.565	0.088	0.0734	0.0038	0.0535	0.009		456	23	454	56	390	110	0
67	0.732	0.095	0.095	0.0053	0.0514	0.0083		585	31	582	65	550	160	1
68	0.821	0.063	0.0991	0.0043	0.0592	0.0059		609	25	609	36	710	110	0
69	1.41	0.13	0.1465	0.0071	0.0649	0.0067		881	40	884	55	780	110	0.339367
70	0.773	0.092	0.0928	0.0042	0.0564	0.0072		572	25	571	55	640	150	0
71	1.39	0.2	0.142	0.01	0.074	0.012		856	58	859	86	1180	170	0.349243
72	0.5	0.1	0.0637	0.0042	0.054	0.012		398	26	400	72	830	230	0.5
73	0.631	0.064	0.0807	0.004	0.0563	0.0067		500	24	504	39	490	120	0.793651
74	0.423	0.087	0.0586	0.0042	0.056	0.012		367	26	369	56	590	150	0.542005
75	10.14	0.41	0.395	0.021	0.164	0.013		2143	96	2455	41	2488	54	19
76	0.43	0.21	0.0514	0.0044	0.051	0.027		323	27	350	140	430	240	7.71429
77	0.575	0.066	0.0732	0.0033	0.0526	0.0069		455	20	455	45	600	140	0
78	0.635	0.076	0.0793	0.004	0.0562	0.0075		492	24	491	46	630	110	0
79	8.87	0.3	0.434	0.017	0.155	0.011		2324	76	2320	32	2395	49	6
80	8.44	0.78	0.422	0.04	0.144	0.013		2260	180	2268	82	2302	83	8
81	3.1	0.28	0.16	0.012	0.124	0.017		953	67	1418	71	1960	210	32.7927
82	0.94	0.12	0.0847	0.0075	0.096	0.017		523	44	683	74	1570	160	23.4261
83	0.428	0.085	0.0535	0.0047	0.059	0.014		336	29	370	56	930	150	9.18919
84	0.82	0.23	0.0944	0.0075	0.06	0.018		581	44	580	130	960	280	0
85	0.67	0.13	0.0818	0.0051	0.058	0.011		506	30	507	80	1080	140	0.197239
86	0.49	0.11	0.0606	0.0041	0.055	0.013		379	25	390	74	790	220	2.82051
87	0.56	0.12	0.068	0.0059	0.06	0.013		424	35	439	77	920	210	3.41686
88	0.526	0.082	0.0696	0.004	0.057	0.01		434	24	436	50	960	280	0.458716
89	0.691	0.082	0.0855	0.0044	0.0562	0.0072		529	26	528	52	710	100	0
90	3.73	0.18	0.276	0.013	0.1073	0.0083		1568	66	1572	38	1747	69	7
91	0.73	0.23	0.083	0.0062	0.058	0.019		514	37	530	140	580	310	3.01887
92	0.683	0.082	0.0832	0.0045	0.059	0.0085		514	27	518	50	760	110	0.772201
93	0.56	0.11	0.0702	0.0053	0.063	0.014		437	32	438	77	1030	210	0.228311
94	0.54	0.13	0.0624	0.0045	0.061	0.015		390	28	405	84	810	230	3.7037
95	1.25	0.29	0.14	0.011	0.059	0.013		843	61	850	110	730	170	0.823529
96	4.67	0.24	0.295	0.015	0.1107	0.0096		1665	77	1778	42	1799	71	8
97	0.93	0.13	0.0746	0.0047	0.071	0.01		463	28	651	69	1070	200	28.8786
98	0.603	0.077	0.0758	0.004	0.0584	0.0092		470	24	472	52	770	140	0.423729
99	8.26	0.62	0.376	0.017	0.159	0.014		2056	80	2281	69	2458	89	18
100	0.391	0.072	0.0512	0.003	0.058	0.012		322	18	324	53	810	160	0.617284
101	0.395	0.053	0.0532	0.0025	0.0527	0.0075		334	15	337	37	670	130	0.890208
102	1.1	0.17	0.1226	0.0061	0.0598	0.0096		745	35	747	73	730	150	0.267738
103	1.57	0.19	0.131	0.011	0.068	0.011		795	64	949	78	960	210	16.2276
104	1.27	0.31	0.0636	0.0062	0.152	0.04		397	37	780	160	2510	260	49.1026
105	0.66	0.35	0.0763	0.009	0.052	0.027		474	54	470	220	640	370	0.851064
106	0.59	0.12	0.0774	0.0049	0.057	0.012		481	30	484	75	840	200	0.619835
107	0.41	0.17	0.0481	0.0069	0.066	0.027		303	43	330	130	1190	230	8.18182
108	1.63	0.49	0.119	0.014	0.074	0.025		727	80	950	180	1100	200	23.4737
109	6.2	0.59	0.304	0.012	0.121	0.015		1712	58	1995	87	1964	49	18
110	0.387	0.057	0.0523	0.0028	0.0528	0.0088		329	17	331	40	900	180	0.60423
111	6.47	0.36	0.373	0.017	0.127	0.01		2041	79	2057	50	2072	91	8
112	1.2	0.22	0.1279	0.0069	0.068	0.013		775	39	780	100	950	210	0.641026
113	5.27	0.37	0.333	0.015	0.115	0.01		1852	71	1863	57	1857	80	8
114	1.4	0.14	0.1451	0.0073	0.0656	0.007		873	41	874	61	760	160	0.114416
115	15.6	1.5	0.556	0.034	0.204	0.021		2850	140	2861	84	2849	95	9
116	8.49	0.35	0.424	0.017	0.1436	0.0099		2278	78	2280	37	2282	58	6
117	1.81	0.54	0.172	0.017	0.084	0.031		1021	94	1020	220	1270	390	20
118	1.11	0.19	0.1024	0.0073	0.076	0.015		628	43	792	98	1300	200	20.7071
119	0.72	0.14	0.0881	0.0053	0.056	0.011		544	31	544	85	600	190	0
120	0.404	0.039	0.0534	0.0026	0.0572	0.0061		335	16	339	28	540	100	1.17994
121	0.43	0.069	0.0561	0.0033	0.062	0.011		352	20	353	49	830	200	0.283286
122	0.77	0.19	0.0913	0.0067	0.055	0.013		562	40	560	120	880	200	0.357143
123	2.34	0.35	0.0777	0.0059	0.205	0.03		482	35	1240	110	2910	170	61.129
124	0.466	0.09	0.0496	0.004	0.055	0.011		312	25	381	64	560	160	18.1102
125	0.542	0.067	0.0693	0.0032	0.0541	0.0077		432	19	434	43	750	140	0.460829
126	1.39	0.15	0.1459	0.0073	0.0668	0.0076		878	41	879	62	900	140	0.113766
127	4	0.44	0.204	0.013	0.132	0.014		1203	64	1612	88	2090	110	32
128	1.25	0.29	0.147	0.012	0.066	0.01		886	67	890	120	820	280	0.449438
129	4.69	0.72	0.314	0.021	0.105	0.015		1760	100	1750	130	1810	110	7
130	0.584	0.066	0.0735	0.004	0.0515	0.0078		457	24	460	42	590	200	0.652174
131	0.74	0.15	0.0888	0.0054	0.059	0.012		548	32	550	93	1020	220	0.363636
132	0.426	0.079	0.0558	0.0026	0.051	0.011		350	16	353	56	660	240	0.849858
133	5.04	0.18	0.326	0.013	0.1144	0.0078		1819	63	1822	31	1871	56	5
134	1.56	0.16	0.1161	0.0056	0.085	0.01		708	32	942	65	1330	140	24.8408
135	0.81	0.13	0.0812	0.0065	0.073	0.013		502	39	576	74	1190	160	12.8472
136	9.6	1	0.453	0.048	0.162	0.012		2370	210	2370	97	2476	74	17
137	20.9	1.5	0.458	0.023	0.272	0.024		2430	100	3125	70	3340	95	46
138	0.437	0.04	0.0579	0.0032	0.0571	0.0061		363	19	367	28	530	97	1.08992
139	0.81	0.3	0.0653	0.008	0.091	0.037		407	48	540	180	1640	450	24.6296
140	4.56	0.3	0.308	0.017	0.107	0.01		1731	82	1731	56	1765	84	9
141	1.59	0.14	0.1402	0.0068	0.0827	0.009		845	39	953	55	1340	120	11.3326
142	4.53	0.48	0.282	0.018	0.104	0.014		1637	84	1701	89	1660	140	16
143	4.23	0.3	0.288	0.014	0.1045	0.0096		1631	69	1673	58	1646	97	7
144	0.382	0.069	0.0478	0.003	0.059	0.012		301	19	307	49	1060	220	1.9544
145	14.8	1.9	0.539	0.036	0.186	0.021		2770	150	2770	130	2640	140	13
146	0.891	0.085	0.1027	0.0049	0.0606	0.0069		630	29	630	46	660	110	0
147	0.589	0.066	0.0742	0.0037	0.0538	0.0069		461	22	466	42	440	110	1.07296
148	0.576	0.065	0.076	0.0035	0.0552	0.0069		472	21	475	41	580	130	0.631579
149	4.32	0.28	0.283	0.012	0.1056	0.0093		1607	60	1699	50	1760	100	8
RAS98-8 (Locality: N 74 45.552, E 100 58.266)
G1	0.80282	0.00694	0.09545	0.0008	0.06144	0.00042		587.689	12.0577	598.418	12.4619	654.674	9.23912	1.79294
G2	0.79749	0.00867	0.09327	0.00079	0.06083	0.00047		574.847	11.9586	595.412	12.8612	633.228	9.92274	3.4538
G3	0.50707	0.00537	0.06743	0.00058	0.0557	0.00046		420.654	9.64764	416.477	10.9039	440.43	8.54445	1.00284
G4	0.50708	0.00381	0.06683	0.00056	0.05567	0.00037		417.029	9.40988	416.484	10.0062	439.231	7.38188	0.130938
G5	1.60247	0.01985	0.10373	0.00089	0.09723	0.00072		636.231	13.0384	971.174	16.0305	1571.65	14.4816	34.4885
G6	0.71178	0.00534	0.08822	0.00074	0.05883	0.00038		545.001	11.4094	545.803	11.6099	560.811	8.20895	0.146817
G7	0.77765	0.0093	0.09229	0.00079	0.06135	0.00051		569.066	11.9669	584.142	13.2657	651.528	10.637	2.58083
G8	0.6695	0.00388	0.08298	0.00069	0.05835	0.00034		513.886	10.8566	520.408	10.897	542.929	7.54293	1.2534
G9	0.72842	0.0094	0.07823	0.00068	0.05993	0.00053		485.549	10.7732	555.625	12.5292	601.048	10.6655	12.6121
G10	0.80004	0.01211	0.08042	0.00071	0.06244	0.00061		498.629	11.1147	596.851	13.5818	689.213	12.4182	16.4567
G11	0.71892	0.00775	0.08747	0.00075	0.05956	0.00047		540.557	11.534	550.029	12.5347	587.627	9.68344	5.49413
G12	0.31877	0.00489	0.03653	0.00033	0.05394	0.00066		231.288	6.74687	280.956	9.24078	368.545	10.2056	14.669
G13	0.69573	0.0101	0.07153	0.00063	0.05897	0.00058		445.367	10.2224	536.237	12.5015	565.989	11.1771	13.1614
G14	0.64075	0.01559	0.06638	0.00064	0.06128	0.00097		414.309	10.38	502.77	16.1668	649.077	17.8245	15.602
G15	0.69178	0.00561	0.08507	0.00072	0.05931	0.0004		526.314	11.1972	533.869	11.6586	578.494	8.59062	12.9972
G16	3.85069	0.04632	0.23823	0.00202	0.10166	0.00064		1377.49	23.675	1603.41	19.1462	1654.65	12.9209	0.0664057
G17	2.10137	0.02318	0.17252	0.00146	0.07907	0.00052		1025.98	18.6961	1149.26	16.8521	1173.89	11.7944	0.169812
G18	0.36626	0.00341	0.04677	0.0004	0.05708	0.00046		294.661	7.56889	316.878	9.06284	494.625	8.95301	5.43996
G19	0.7733	0.01276	0.07905	0.0007	0.06218	0.00066		490.45	11.006	581.654	13.9818	680.305	13.1674	13.293
G20	1.54021	0.01403	0.09425	0.0008	0.11804	0.00076		580.623	12.0681	946.588	15.7392	1926.76	13.7569	3.29304
G21	3.21683	0.02564	0.24516	0.00205	0.09472	0.00054		1413.47	23.8686	1461.22	18.3031	1522.51	11.6349	1.72212
G22	0.82466	0.00933	0.09343	0.0008	0.06287	0.0005		575.791	12.0751	610.645	13.2618	703.836	10.7176	14.3386
G23	3.3694	0.03211	0.25655	0.00216	0.09425	0.00056		1472.17	24.8049	1497.31	18.7403	1513.13	11.9895	0.705179
G24	3.30511	0.02481	0.25563	0.00214	0.09366	0.00053		1467.45	24.6157	1482.26	18.3915	1501.27	11.514	0.199572
G25	2.55786	0.02399	0.21794	0.00184	0.08583	0.00052		1270.98	22.12	1288.68	17.849	1334.36	11.6396	15.4311
G26	0.84747	0.00938	0.09517	0.00082	0.06405	0.0005		586.041	12.2956	623.26	13.4243	743.282	10.8709	13.1385
G27	0.99613	0.0091	0.11492	0.00097	0.064	0.00043		701.258	13.8592	701.843	13.673	741.63	9.71371	2.89502
G28	0.81809	0.0104	0.08168	0.00071	0.06272	0.00054		506.143	11.1049	606.982	12.9272	698.751	11.3406	15.9739
G29	3.8595	0.03934	0.26515	0.00224	0.09989	0.0006		1516.14	25.4695	1605.26	19.1674	1622.04	12.3712	1.36749
G30	0.8395	0.00965	0.09327	0.0008	0.06197	0.00049		574.847	12.0765	618.87	13.1489	673.074	10.4241	0.342017
G31	0.8595	0.02341	0.08159	0.0008	0.06634	0.00107		505.606	12.1784	629.85	19.0237	817.122	20.7486	12.5983
G32	1.39658	0.02395	0.10819	0.00096	0.08048	0.00075		662.228	13.8109	887.488	16.8986	1208.78	15.8124	17.6781
G33	0.90733	0.0115	0.0826	0.00072	0.07949	0.00067		511.623	11.2168	655.637	14.3421	1184.36	14.4274	11.7623
G34	2.69116	0.02609	0.22179	0.00187	0.08711	0.00053		1291.33	22.3752	1326.03	17.994	1362.93	11.77	1.58597
G35	0.80095	0.0067	0.09576	0.00081	0.06067	0.00041		589.513	12.1727	597.364	12.4211	627.555	8.96884	0.966285
G36	5.34454	0.07167	0.2836	0.00241	0.11557	0.00072		1609.47	26.8489	1876.02	20.1631	1888.79	13.3247	13.6059
G37	2.68764	0.02032	0.21695	0.00182	0.08991	0.00052		1265.74	21.9239	1325.06	17.7261	1423.62	11.4969	2.00481
G38	0.32181	0.00282	0.04427	0.00038	0.05316	0.00042		279.246	7.33376	283.294	8.44632	335.632	7.15819	15.858
G39	0.81687	0.00799	0.09678	0.00083	0.06126	0.00045		595.511	12.399	606.301	12.9563	648.376	9.68239	2.82023
G40	0.88941	0.02355	0.08329	0.00081	0.06529	0.00101		515.731	12.2824	646.052	18.5426	783.695	19.538	14.4106
G41	0.66728	0.00969	0.07169	0.00063	0.05935	0.00059		446.329	10.2213	519.057	12.6049	579.959	11.4267	18.9864
G42	0.9065	0.01935	0.08951	0.00083	0.06455	0.00081		552.639	12.4641	655.195	16.6918	759.703	16.066	17.437
G43	0.33296	0.00355	0.04642	0.0004	0.05314	0.00048		292.505	7.57053	291.823	9.07629	334.779	7.79421	16.9459
G44	0.57823	0.00541	0.0641	0.00055	0.06565	0.00049		400.512	9.30608	463.323	11.122	795.236	10.8734	13.1028
G45	5.5976	0.07931	0.29159	0.00249	0.12089	0.00077		1649.47	27.4977	1915.73	20.5847	1969.4	13.7174	17.5947
G46	0.78152	0.00828	0.09179	0.00079	0.06245	0.00048		566.115	11.9712	586.35	12.9869	689.555	10.3362	1.41516
G47	5.40889	0.06035	0.29646	0.00251	0.11824	0.0007		1673.73	27.6032	1886.26	20.0255	1929.8	12.8675	16.7503
G48	8.86361	0.09714	0.33711	0.00285	0.17477	0.001		1872.75	30.1228	2324.06	21.1009	2603.86	13.3675	12.5997
G49	3.95347	0.05735	0.24033	0.00206	0.10228	0.00069		1388.41	24.0552	1624.7	19.7468	1665.9	13.6864	7.01126
G50	1.01484	0.00997	0.11254	0.00096	0.06384	0.00045		687.482	13.7673	711.316	13.8252	736.334	10.0251	15.6802
G51	0.65766	0.00547	0.08164	0.00069	0.05876	0.0004		505.904	10.8668	513.182	11.4159	558.215	8.48855	38.6614
G52	0.338	0.00252	0.04569	0.00039	0.05415	0.00038		288.006	7.45068	295.655	8.35009	377.293	7.06503	7.16218
G53	0.70572	0.00833	0.08125	0.0007	0.05897	0.0005		503.58	10.989	542.202	12.4076	565.989	9.9999	5.70776
G54	1.50457	0.01732	0.14286	0.00122	0.07149	0.00051		860.815	16.4052	932.241	15.8559	971.457	11.5642	2.70713
G55	0.38376	0.00275	0.04422	0.00038	0.06334	0.00043		278.938	7.33398	329.801	8.83811	719.666	9.64218	2.25293
G56	0.92884	0.00987	0.10638	0.00091	0.06248	0.00047		651.69	13.2466	667.024	13.7044	690.579	10.1801	4.74956
G57	3.29042	0.03807	0.22421	0.00191	0.09428	0.0006		1304.08	22.7574	1478.79	18.7199	1513.73	12.6557	5.9716
G58	0.89638	0.0141	0.08858	0.00079	0.06501	0.00064		547.134	11.9987	649.791	14.5814	774.66	13.312	0.0833792
G59	5.50833	0.07227	0.28684	0.00245	0.12123	0.00076		1625.72	27.1887	1901.9	20.4452	1974.41	13.5519	16.6133
G60	1.79116	0.01803	0.17192	0.00146	0.0747	0.00049		1022.68	18.7043	1042.25	16.5687	1060.44	11.2753	6.52877
G61	9.45199	0.14475	0.37168	0.00319	0.16369	0.00101		2037.3	32.6259	2382.89	21.8218	2494.14	14.098	7.11333
G62	0.79452	0.01276	0.07345	0.00066	0.06625	0.00069		456.907	10.5692	593.733	13.8587	814.284	14.3077	19.7259
G63	0.37635	0.0032	0.04538	0.00039	0.06034	0.00045		286.095	7.4521	324.349	8.97533	615.789	9.52891	25.3818
G64	0.96468	0.0104	0.10717	0.00092	0.06505	0.00049		656.291	13.3554	685.718	14.0093	775.954	10.8153	21.9655
G65	0.59814	0.00715	0.06872	0.0006	0.06078	0.00054		428.439	9.88046	476.053	11.8865	631.457	10.9971	5.25361
G66	0.81379	0.01338	0.08767	0.00078	0.05868	0.00063		541.742	11.888	604.578	14.3926	555.244	11.8259	1.31435
G67	0.89167	0.01432	0.0879	0.00078	0.06299	0.00063		543.105	11.886	647.266	14.3971	707.893	12.8384	14.7884
G68	3.02916	0.03576	0.21638	0.00185	0.09054	0.00059		1262.72	22.251	1415	18.5747	1436.95	12.6614	11.09
G69	0.79681	0.00642	0.09573	0.00081	0.06014	0.0004		589.336	12.173	595.028	12.3141	608.615	8.73186	1.42878
G70	0.77166	0.0143	0.07963	0.00072	0.05926	0.00069		493.914	11.2403	580.715	14.4428	576.661	12.8877	1.77963
G71	1.71627	0.05242	0.143	0.0014	0.07576	0.00106		861.604	18.4339	1014.63	23.4146	1088.74	21.3315	20.172
G72	0.44187	0.00461	0.05707	0.00049	0.05675	0.00048		357.782	8.61859	371.57	10.1978	481.831	9.13187	14.0115
G73	11.7579	0.30288	0.41182	0.00368	0.18634	0.00134		2223.24	36.2482	2585.32	23.9239	2710.12	16.2335	15.6529
G74	0.80758	0.00687	0.09646	0.00082	0.06029	0.00041		593.63	12.2842	601.096	12.4804	613.999	8.90867	0.233599
G75	0.74996	0.00997	0.08081	0.00071	0.06124	0.00055		500.956	11.1117	568.201	12.9906	647.674	11.243	13.5568
G76	1.00442	0.0072	0.11518	0.00098	0.0629	0.00039		702.761	13.9722	706.051	13.3263	704.851	8.94433	16.2451
G77	5.71408	0.08312	0.29874	0.00257	0.12153	0.00078		1685.06	28.155	1933.5	20.8095	1978.81	13.8194	3.45108
G78	1.01261	0.01066	0.11423	0.00098	0.06355	0.00047		697.267	13.9818	710.192	14.1486	726.688	10.319	13.269
G79	0.52199	0.01283	0.05287	0.00053	0.06291	0.00106		332.118	9.13225	426.48	15.1605	705.19	19.7741	28.0777
G80	0.65899	0.00468	0.08292	0.0007	0.05746	0.00037		513.528	10.9761	513.996	11.1908	509.232	7.79946	16.6572
G81	0.6237	0.00751	0.07312	0.00064	0.05836	0.00051		454.925	10.3314	492.164	11.9463	543.303	9.99588	3.35068
G82	0.31958	0.00318	0.04321	0.00038	0.05363	0.00046		272.699	7.33852	281.579	8.683	355.545	7.788	1.41808
G83	0.64126	0.01342	0.06779	0.00064	0.05863	0.0008		422.827	10.3697	503.086	14.5707	553.384	14.2846	2.58713
G84	5.46724	0.14083	0.27791	0.00252	0.12005	0.00103		1580.83	28.0664	1895.47	23.4662	1956.96	17.5299	7.1232
G85	0.35863	0.00259	0.04594	0.00039	0.05696	0.00039		289.547	7.44953	311.191	8.51449	489.985	7.9648	7.66173
G86	0.58681	0.00798	0.07565	0.00067	0.05666	0.00055		470.106	10.6729	468.828	12.5546	478.324	10.0477	15.4224
G87	0.82095	0.01545	0.07911	0.00073	0.06389	0.00075		490.808	11.364	608.578	15.0953	737.991	14.9563	2.29888
G88	0.75612	0.00534	0.0882	0.00075	0.06186	0.00039		544.883	11.5281	571.769	11.8711	669.272	8.82223	13.8497
G89	0.76783	0.01092	0.07894	0.0007	0.0603	0.00057		489.793	11.0068	578.517	13.0718	614.357	11.3564	15.7985
G90	0.97186	0.01174	0.1027	0.00089	0.06289	0.00051		630.213	13.0481	689.422	13.9955	704.513	10.882	14.5212
G91	0.94664	0.00938	0.10852	0.00093	0.06277	0.00045		664.147	13.4587	676.352	13.6315	700.448	9.89734	3.56075
G92	0.71882	0.01099	0.07477	0.00067	0.06078	0.00062		464.83	10.6794	549.97	13.2638	631.457	12.2348	14.5031
G93	0.76673	0.00645	0.09284	0.00079	0.06005	0.00041		572.311	11.9622	577.885	12.2711	605.377	8.86913	23.0449
G94	0.72439	0.00936	0.07818	0.00069	0.05815	0.00052		485.25	10.8932	553.255	12.4733	535.418	10.0842	11.7941
G95	2.30665	0.02241	0.19179	0.00164	0.08734	0.00056		1131.06	20.3838	1214.33	17.7887	1368.01	12.2782	4.29135
G96	0.96561	0.01302	0.09586	0.00084	0.06365	0.00055		590.101	12.5248	686.199	14.0609	730.021	11.6397	10.0017
G97	1.95945	0.02679	0.1582	0.00138	0.07735	0.00058		946.766	18.004	1101.69	17.3091	1130.23	12.8669	10.3933
G98	3.41758	0.03187	0.26176	0.00223	0.0956	0.00058		1498.84	25.4286	1508.44	19.109	1539.92	12.2589	16.0924
G99	0.74488	0.02037	0.06992	0.00071	0.06759	0.00114		435.674	11.1979	565.249	18.4155	856.007	22.1519	12.1248
G100	3.42828	0.03172	0.25658	0.00219	0.09652	0.00059		1472.32	25.1121	1510.9	19.1327	1557.91	12.3793	0.956451
G101	2.23702	0.03558	0.17609	0.00155	0.08116	0.00065		1045.58	19.634	1192.72	18.6737	1225.32	14.0406	14.9473
G102	3.78593	0.0448	0.23981	0.00206	0.09849	0.00063		1385.71	24.0642	1589.77	19.2822	1595.73	12.9338	15.082
G103	0.85864	0.01319	0.08589	0.00077	0.06175	0.00061		531.184	11.7844	629.38	14.0849	665.462	12.2866	3.71079
G104	0.41087	0.00623	0.0483	0.00044	0.0538	0.00062		304.076	8.05365	349.501	10.5112	362.687	9.67151	17.9655
G105	0.52427	0.00531	0.0686	0.0006	0.05567	0.00045		427.716	9.88127	428	10.9846	439.231	8.40669	1.24204
G106	0.69657	0.00752	0.08698	0.00076	0.0582	0.00046		537.652	11.6566	536.74	12.4775	537.299	9.23742	11.8348
G107	0.37206	0.00369	0.04824	0.00042	0.05662	0.00047		303.707	7.80797	321.179	9.32528	476.763	8.95878	0.466007
G108	0.51883	0.00783	0.05874	0.00053	0.05576	0.00061		367.958	9.09626	424.369	11.6013	442.825	10.4946	14.8449
G109	1.00759	0.00888	0.112	0.00096	0.06499	0.00044		684.353	13.7727	707.656	13.7529	774.013	9.97583	1.81987
G110	1.36539	0.01788	0.12318	0.00108	0.06935	0.00055		748.841	15.0393	874.187	15.6267	909.169	12.1695	22.1258
G111	0.76163	0.00851	0.0926	0.00081	0.06038	0.00049		570.896	12.2003	574.95	13.1905	617.22	10.1487	0.0909738
G112	0.97923	0.00915	0.11329	0.00098	0.06293	0.00044		691.827	13.9914	693.21	13.8392	705.866	9.75599	7.56627
G113	0.32474	0.00501	0.03817	0.00035	0.05266	0.00065		241.48	6.98876	285.542	9.41833	314.175	9.31296	3.15364
G114	0.56915	0.00792	0.06358	0.00057	0.05633	0.00056		397.361	9.55178	457.465	11.6289	465.399	10.065	15.9533
G115	1.6275	0.01681	0.15923	0.00137	0.07249	0.0005		952.496	17.8792	980.893	16.3948	999.73	11.4164	19.2203
G116	0.53867	0.00744	0.05869	0.00052	0.05783	0.00058		367.654	8.97479	437.547	11.3058	523.327	10.8449	6.95528
G117	0.80491	0.00768	0.09608	0.00083	0.06074	0.00044		591.395	12.4052	599.595	12.8504	630.039	9.44332	0.272409
G118	0.95669	0.00853	0.11112	0.00096	0.06272	0.00043		679.249	13.7815	681.58	13.6179	698.751	9.56874	19.3517
G119	0.37141	0.00268	0.04444	0.00038	0.06072	0.00041		280.296	7.33299	320.698	8.64203	629.33	8.97654	4.70229
G120	0.86862	0.0132	0.09078	0.00081	0.06117	0.00059		560.149	12.2162	634.818	14.2129	645.217	11.854	15.3366
G121	0.77938	0.00888	0.09344	0.00082	0.06058	0.00049		575.85	12.3109	585.13	13.2664	624.355	10.1866	8.58828
G122	0.64231	0.00544	0.08046	0.00069	0.05767	0.0004		498.868	10.8758	503.735	11.3812	517.247	8.26438	1.80448
G123	0.67346	0.00876	0.07258	0.00064	0.05921	0.00054		451.681	10.3352	522.814	12.2274	574.826	10.6482	15.4809
G124	0.95374	0.01021	0.10891	0.00095	0.06296	0.00048		666.415	13.6874	680.048	14.0754	706.88	10.4067	0.964534
G125	0.7884	0.01264	0.08009	0.00072	0.06181	0.00064		496.66	11.2367	590.264	13.9386	667.541	12.7734	12.2918
G126	1.68063	0.01513	0.16292	0.0014	0.07414	0.00048		972.984	18.1634	1001.22	16.2942	1045.28	11.0934	17.3203
G127	0.9758	0.01678	0.09615	0.00087	0.06385	0.00066		591.807	12.875	691.449	15.4312	736.665	13.4721	14.0043
G128	0.62353	0.00903	0.06379	0.00057	0.06112	0.00062		398.633	9.55041	492.057	12.2402	643.46	12.3115	14.0627
G129	0.71663	0.01187	0.0728	0.00066	0.06128	0.00067		453.003	10.574	548.676	13.6271	649.077	13.1289	2.6679
G130	0.53491	0.00724	0.0604	0.00054	0.05538	0.00055		378.058	9.20774	435.063	11.2074	427.597	9.57378	22.9236
T99-26 (Locality: N 77 21.000, E 102 40.002)
G1	0.32952	0.00481	0.04034	0.00035	0.06029	0.00064		254.94	8.18264	289.199	10.8369	613.999	13.627	11.8462
G2	0.29101	0.00599	0.04076	0.00039	0.0535	0.00081		257.542	8.67641	259.354	12.2529	350.061	12.811	0.698655
G3	0.35673	0.00742	0.03844	0.00038	0.07043	0.00104		243.156	8.56305	309.77	13.6542	940.916	21.9612	21.5044
G4	0.28764	0.0079	0.03863	0.00042	0.05551	0.00113		244.335	9.05872	256.7	14.5398	432.823	18.1924	4.81676
G5	0.28597	0.00473	0.04084	0.00037	0.05216	0.00064		258.038	8.4283	255.382	10.8771	292.43	10.0804	1.03971
G6	0.29362	0.00624	0.04251	0.00041	0.05232	0.00082		268.372	8.91564	261.405	12.6159	299.421	11.9734	2.66545
G7	0.27313	0.00415	0.03894	0.00035	0.05209	0.00059		246.259	8.18849	245.193	10.2626	289.363	9.54882	0.434807
G8	0.3653	0.00478	0.03831	0.00033	0.06888	0.00064		242.349	7.94278	316.164	10.7093	895.148	14.8999	23.3471
G9	0.27787	0.00466	0.04018	0.00037	0.05102	0.00063		253.949	8.43121	248.966	10.7384	241.734	9.15759	2.00112
G10	0.36263	0.00456	0.038	0.00033	0.06915	0.00063		240.424	7.944	314.176	10.6429	903.218	14.7454	23.4748
G11	0.28099	0.00482	0.0398	0.00037	0.05265	0.00067		251.593	8.43288	251.443	11.0191	313.743	10.7144	0.0598848
G12	0.27787	0.00462	0.04024	0.00037	0.0524	0.00065		254.32	8.43094	248.966	10.9081	302.904	10.3427	2.15047
G13	0.27967	0.00828	0.03768	0.00044	0.05543	0.00123		238.436	9.31198	250.396	15.2306	429.609	19.3913	4.77616
G14	0.32197	0.00677	0.03798	0.00039	0.062	0.00094		240.3	8.68935	283.417	12.9594	674.109	18.7827	15.2133
G15	0.26157	0.00345	0.03376	0.0003	0.05598	0.00055		214.038	7.58666	235.931	9.40621	451.575	11.0081	9.27955
G16	0.26139	0.00919	0.03728	0.00048	0.05319	0.00142		235.951	9.81127	235.786	16.7683	336.91	19.154	0.0697965
G17	0.266	0.00513	0.03593	0.00036	0.05447	0.00079		227.556	8.32556	239.491	11.4523	390.532	13.2491	4.98347
G18	0.9686	0.02003	0.11787	0.00112	0.06247	0.0007		718.292	16.7625	687.742	18.8759	690.238	15.0698	4.44212
G19	0.25142	0.00571	0.0373	0.00039	0.05085	0.00088		236.075	8.69252	227.729	12.3571	234.036	11.0797	3.66502
G20	0.28355	0.01	0.03778	0.00049	0.05552	0.00149		239.058	9.93263	253.47	17.4241	433.224	22.7738	5.68593
G21	0.09257	0.00296	0.03583	0.00039	0.01997	0.00056		226.933	8.6994	89.8946	9.33053	0	0	152.444
G22	0.28571	0.0077	0.0402	0.00046	0.05531	0.00112		254.073	9.54663	255.177	14.9279	424.776	17.9032	0.432833
G23	0.24998	0.00478	0.03728	0.00037	0.0511	0.00074		235.951	8.44403	226.56	11.2616	245.343	10.1576	4.14508
G24	0.2568	0.00565	0.03775	0.0004	0.05064	0.00084		238.871	8.81466	232.085	12.1832	224.477	10.5265	2.9241
G25	0.25277	0.00447	0.03787	0.00037	0.04986	0.00066		239.617	8.44141	228.824	10.7467	188.472	8.39905	4.71668
G26	0.24759	0.00463	0.03769	0.00038	0.0497	0.0007		238.499	8.56646	224.617	11.0653	180.987	8.51482	0.180275
G27	0.27587	0.00681	0.03891	0.00043	0.05196	0.00096		246.073	9.18141	247.376	13.3757	283.65	12.9897	0.526714
G28	0.26207	0.00469	0.03932	0.00039	0.04982	0.00066		248.617	8.6831	236.334	10.9921	186.604	8.36156	5.19728
G29	0.24511	0.00396	0.03661	0.00036	0.04937	0.00058		231.786	8.32263	222.596	10.0518	165.44	7.43216	4.12837
G30	0.38433	0.00906	0.03918	0.00044	0.07291	0.00121		247.748	9.30409	330.219	15.344	1011.45	25.1009	24.9746
G31	0.27802	0.00489	0.03959	0.0004	0.05188	0.00065		250.291	8.80586	249.086	11.0587	280.125	9.97942	0.483943
G32	0.31857	0.00731	0.04085	0.00045	0.05816	0.00096		258.1	9.4192	280.802	13.789	535.794	17.5893	8.08486
G33	0.35797	0.00738	0.04272	0.00046	0.06203	0.00089		269.671	9.53285	310.698	13.5937	675.143	17.9966	13.2049
G34	0.27571	0.00545	0.04008	0.00042	0.05119	0.00072		253.329	9.05145	247.249	11.6994	249.395	10.0656	2.45911
G35	0.25785	0.00484	0.03782	0.00039	0.04978	0.00067		239.306	8.69009	232.933	10.9412	184.734	8.39174	2.73609
G36	0.28617	0.00632	0.03676	0.00041	0.05782	0.00092		232.719	8.94376	255.54	12.7884	522.948	16.8514	8.93076
G37	0.26563	0.00865	0.03789	0.00049	0.05144	0.00126		239.741	9.93198	239.194	15.7596	260.596	15.1049	0.228721
G38	0.25625	0.00523	0.03885	0.00042	0.04933	0.00072		245.701	9.05761	231.64	11.5546	163.545	8.25457	6.06989
G39	0.26987	0.00874	0.03854	0.0005	0.05109	0.00124		243.777	10.0523	242.59	15.7783	244.893	14.4077	0.489329
G40	0.27801	0.00573	0.04012	0.00043	0.05109	0.00074		253.577	9.1752	249.078	11.9078	244.893	10.1486	1.80627
G41	0.32581	0.01211	0.03974	0.00056	0.0593	0.00161		251.221	10.7892	286.362	19.0794	578.128	27.7804	12.2715
G42	0.33249	0.00608	0.03815	0.0004	0.06337	0.00077		241.356	8.81274	291.465	11.9932	720.671	16.3861	17.1923
G43	0.28489	0.00881	0.03828	0.00049	0.0556	0.00126		242.163	9.9297	254.529	15.8368	436.431	19.9236	4.85857
G44	0.27887	0.00577	0.03978	0.00043	0.05211	0.00074		251.469	9.17694	249.761	11.9013	290.24	11.0149	0.684015
G45	0.29236	0.00694	0.04091	0.00047	0.05142	0.00085		258.471	9.6666	260.415	13.0365	259.703	11.4211	0.746572
G46	0.29617	0.00603	0.03759	0.00041	0.05654	0.00077		237.877	8.93968	263.404	11.8753	473.636	14.1549	9.6912
G47	0.31056	0.00852	0.0394	0.00048	0.05861	0.00113		249.113	9.7991	274.615	15.0303	552.64	20.279	9.28651
G48	0.30361	0.00915	0.04248	0.00054	0.05394	0.00116		268.187	10.5236	269.216	16.0249	368.545	17.1384	0.382251
G49	0.3618	0.01089	0.04105	0.00053	0.06653	0.00139		259.338	10.4089	313.558	17.4888	823.095	27.4107	17.2918
G50	0.3845	0.01131	0.05407	0.00067	0.05339	0.00106		339.461	12.0402	330.344	17.3765	345.407	15.4712	2.75987
G51	0.77438	0.02109	0.04577	0.00057	0.12292	0.00206		288.499	10.8724	582.272	22.368	1999.04	33.1264	50.4529
G52	0.28385	0.00717	0.04249	0.0005	0.05121	0.00088		268.249	10.0288	253.707	13.6059	250.294	11.4691	5.73168
G53	0.30486	0.00935	0.04253	0.00054	0.05366	0.00116		268.496	10.5232	270.189	16.031	356.807	16.8527	0.626621
G54	0.27857	0.0064	0.03872	0.00044	0.05133	0.00077		244.894	9.30651	249.523	12.0654	255.677	10.6264	1.85494
G55	0.30282	0.00991	0.04006	0.00054	0.05881	0.00137		253.205	10.5391	268.6	17.2463	560.07	23.9018	5.73178
G56	0.29303	0.00726	0.04204	0.00049	0.05137	0.00084		265.465	9.90774	260.942	13.2017	257.467	11.2826	1.73368
G57	0.30016	0.00835	0.04304	0.00053	0.05283	0.00099		271.649	10.3964	266.525	14.7138	321.503	14.1734	1.92239
G58	0.28155	0.00788	0.04026	0.0005	0.05287	0.00101		254.444	10.0421	251.886	14.344	323.222	14.4219	1.01554
G59	0.38125	0.01021	0.05542	0.00067	0.05146	0.00089		347.712	12.0297	327.957	15.9397	261.489	11.8192	6.02345
G60	0.69019	0.01851	0.09333	0.00111	0.05687	0.00092		575.201	16.9345	532.915	21.0756	486.496	16.3511	7.93496
G61	0.27909	0.00792	0.04039	0.0005	0.05222	0.00097		255.25	10.0413	249.935	14.058	295.055	13.3576	2.12635
G62	0.29783	0.00842	0.04359	0.00054	0.05131	0.00094		275.047	10.5165	264.704	14.4306	254.781	12.1012	3.90749
G63	0.31347	0.00907	0.04314	0.00054	0.0536	0.001		272.267	10.5193	276.867	14.8748	354.281	15.0047	1.66151
G64	0.29072	0.00905	0.04166	0.00054	0.05364	0.00111		263.114	10.5288	259.126	15.5249	355.966	16.2722	1.53912
G65	0.73788	0.02622	0.09422	0.00125	0.05861	0.00123		580.447	18.5735	561.168	25.6402	552.64	21.7333	3.4355
G66	0.30554	0.01016	0.04433	0.00059	0.05269	0.00116		279.617	11.129	270.718	16.5716	315.471	15.785	3.287
G67	0.50226	0.01501	0.04307	0.00055	0.0862	0.00159		271.834	10.6434	413.231	19.2705	1342.67	31.3204	34.2174
G68	0.34147	0.01403	0.04108	0.00063	0.06129	0.00174		259.524	11.6471	298.285	20.731	649.427	31.0855	12.9947
G69	0.30183	0.01075	0.04047	0.00056	0.05449	0.0013		255.746	10.7843	267.829	16.9041	391.356	19.3411	4.51146
G70	0.28829	0.00879	0.04069	0.00052	0.05134	0.00098		257.108	10.2873	257.213	14.2771	256.125	12.4874	0.0404476
G71	0.32995	0.01207	0.0458	0.00064	0.05348	0.0013		288.684	11.7352	289.528	18.2201	349.216	18.211	0.29132
G72	0.2941	0.00981	0.04107	0.00055	0.05453	0.00117		259.462	10.6564	261.781	15.9634	393.003	17.8293	0.88606
G73	0.37642	0.01204	0.05352	0.0007	0.05139	0.00102		336.096	12.4116	324.401	17.1176	258.362	12.9003	3.60533
G74	0.27342	0.00896	0.03976	0.00053	0.05067	0.00105		251.345	10.417	245.424	14.7228	225.846	12.2373	2.41247
G75	0.31807	0.01087	0.04368	0.00059	0.05469	0.00119		275.603	11.1335	280.417	16.7313	399.572	18.2202	1.71665
G76	0.34618	0.01378	0.0444	0.00065	0.05708	0.0015		280.049	11.8692	301.844	19.664	494.625	24.4239	7.22067
G77	0.2825	0.00954	0.03917	0.00053	0.05323	0.00112		247.686	10.4208	252.639	15.1886	338.613	15.962	1.96035
G78	0.30553	0.01044	0.04238	0.00057	0.05284	0.00112		267.568	10.8953	270.71	15.872	321.933	15.5407	1.1606
G79	0.38801	0.01326	0.04101	0.00055	0.06811	0.00143		259.09	10.6568	332.915	17.9122	871.903	28.4161	22.1752
G80	0.28662	0.01036	0.04008	0.00056	0.05277	0.00121		253.329	10.7869	255.895	16.1565	318.92	16.3965	1.003
G81	0.27597	0.01006	0.03957	0.00055	0.05131	0.00118		250.167	10.6663	247.456	15.7804	254.781	14.2092	1.09573
G82	0.29807	0.01105	0.04082	0.00057	0.05556	0.0013		257.914	10.9058	264.892	17.0266	434.828	20.3971	2.63426
G83	0.87089	0.03198	0.10899	0.0015	0.06013	0.00131		666.88	21.2837	636.05	28.6857	608.256	23.7835	4.84696
G84	0.37931	0.01385	0.04122	0.00057	0.06634	0.00149		260.391	10.9031	326.53	18.5108	817.122	29.0588	20.2553
G85	0.3081	0.01237	0.0427	0.00063	0.05471	0.00141		269.547	11.635	272.707	18.5377	400.391	20.9001	1.15877
G86	0.28347	0.01174	0.03967	0.00059	0.05289	0.00142		250.787	11.1617	253.406	17.8306	324.081	18.7433	1.03364
G87	0.27504	0.01076	0.03748	0.00054	0.05247	0.00129		237.194	10.5557	246.715	16.1892	305.947	16.8339	3.85928
G88	0.66617	0.02673	0.08882	0.00128	0.05799	0.0014		548.555	19.0017	518.381	27.5557	529.384	23.7643	5.82074
G89	0.28694	0.01252	0.0391	0.00061	0.0547	0.00156		247.252	11.4138	256.148	18.8791	399.981	22.7021	3.473
G90	0.2881	0.01179	0.04054	0.0006	0.05264	0.00136		256.179	11.2794	257.063	17.5917	313.311	17.775	0.343689
G91	0.28007	0.0114	0.04139	0.00061	0.05169	0.00132		261.443	11.3972	250.713	17.4844	271.721	16.0212	4.2798
G92	0.29789	0.01287	0.04028	0.00062	0.05576	0.00154		254.568	11.5292	264.751	19.0276	442.825	23.6693	3.84609
G93	0.48529	0.02528	0.04186	0.00076	0.08566	0.00288		264.352	13.25	401.696	29.5166	1330.52	53.7063	34.191
G94	0.91896	0.04689	0.04666	0.00083	0.14373	0.00442		293.983	14.0691	661.81	38.5063	2272.63	59.6351	55.5789
G95	0.692	0.03524	0.09182	0.0015	0.05867	0.00181		566.292	21.558	534.001	34.0593	554.872	30.2213	6.04689
G96	0.26043	0.01167	0.03794	0.00058	0.05058	0.00144		240.051	11.0496	235.013	17.5756	221.735	15.1872	2.14373
G97	0.68683	0.03288	0.09053	0.00142	0.05689	0.00166		558.671	20.6331	530.894	31.7807	487.272	26.4304	5.23208
G98	0.26895	0.0131	0.03864	0.00063	0.05135	0.00164		244.398	11.6654	241.854	19.4877	256.572	18.3271	1.05173
G99	0.28946	0.01421	0.04087	0.00067	0.0535	0.00171		258.223	12.1441	258.134	20.7432	350.061	22.773	0.0345248
G100	0.27923	0.01307	0.04045	0.00064	0.05184	0.00154		255.622	11.7757	250.047	19.1748	278.359	18.3102	2.22964
G101	0.42512	0.01939	0.05789	0.00089	0.05374	0.00152		362.781	14.6918	359.706	23.4698	360.17	20.9978	0.854909
G102	0.27593	0.01307	0.03939	0.00062	0.05276	0.00159		249.051	11.5357	247.424	19.2231	318.49	20.3224	0.657571
G103	0.29163	0.01463	0.03855	0.00064	0.05894	0.00192		243.839	11.7903	259.842	21.5572	564.88	32.0718	6.15863
G104	0.35722	0.01706	0.03536	0.00056	0.07376	0.00222		224.008	10.8185	310.137	22.1129	1034.91	42.9094	27.7714
G105	0.32765	0.01576	0.03717	0.00059	0.0637	0.00194		235.267	11.1793	287.77	21.0101	731.685	35.6063	18.2447
G106	0.2935	0.01593	0.0384	0.00068	0.05747	0.00207		242.908	12.288	261.311	22.8604	509.615	32.7097	7.04251
G107	0.36896	0.02195	0.03685	0.00071	0.07224	0.00287		233.278	12.6737	318.882	27.9202	992.71	54.1742	26.8451
G108	0.29374	0.01473	0.03919	0.00064	0.05528	0.00178		247.81	11.7854	261.499	20.7088	423.565	26.1482	5.23471
G109	0.25659	0.01277	0.03364	0.00054	0.05473	0.00174		213.29	10.5807	231.915	18.4881	401.21	24.919	8.03121
G110	0.27534	0.0141	0.03977	0.00066	0.0524	0.00173		251.407	12.0289	246.954	20.5941	302.904	21.1386	1.80316
G111	0.25053	0.01302	0.03746	0.00062	0.05125	0.00173		237.07	11.5501	227.007	19.8248	252.09	18.9161	4.4329
G112	0.30382	0.02327	0.03853	0.00092	0.06032	0.00329		243.715	15.2665	269.38	33.1884	615.073	54.1689	9.52736
G113	0.33182	0.01803	0.0399	0.00069	0.06198	0.0022		252.213	12.3998	290.954	24.2335	673.419	38.7914	13.3152
G114	0.28281	0.01519	0.03851	0.00066	0.05514	0.00193		243.591	12.0389	252.884	21.7691	417.904	27.8272	3.67503
G115	0.70957	0.04249	0.08309	0.0015	0.06437	0.00242		514.54	21.7007	544.491	39.7925	753.811	43.8529	5.50066
G116	0.30907	0.01678	0.04024	0.00069	0.0572	0.00203		254.32	12.3971	273.46	23.1279	499.252	31.838	6.999
